# Supplementary material for: V1 interneurons regulate the pattern and frequency of locomotor-like activity in the neonatal mouse spinal cord
Source: PLoS Biol. 2019 Sep 12;17(9):e3000447. doi: 10.1371/journal.pbio.3000447 (PMC6759197; doi:10.1371/journal.pbio.3000447)
Supplement: S2 Data — (XLSX) [file pbio.3000447.s008.xlsx]

## Sheet: Fig 3 B
En1-GFP frequency (Hz)		En1-Arch frequency (Hz)		Frequency Change (%)
Control	Light	Control	Light	En1-GFP	En1-Arch
0.83073	0.886118	0.776533	0.660133	0.0666743	-0.149897
0.975446	1.03728	0.623143	0.43593	0.0633907	-0.300434
0.777366	0.824459	0.908378	0.618932	0.0605798	-0.31864
0.80649	0.812974	0.949337	0.709387	0.00803982	-0.252755
0.837642	0.883117	0.935121	0.702252	0.0542899	-0.249026
		1.00792	0.84383		-0.162802
		1.04678	0.667082		-0.36273
		0.884611	0.694923		-0.214431
		0.844637	0.758244		-0.102285
		0.767393	0.77529		0.0102907
		1.03673	0.765158		-0.26195
		0.900148	0.69513		-0.227761

## Sheet: Fig 3C
Angles
En1-GFP				En1-Arch
Control Flexor	Control Extensor	Light Flexor	Light Extensor	Control Flexor	Control Extensor	Light Flexor	Light Extensor
-176.659	108.208	163.898	116.848	173.546	177.071	-179.844	-152.953
-153.531	178.618	-157.22	-170.138	-159.02	170.218	173.644	179.524
175.023	139.142	172.546	135.194	174.171	-154.248	-172.747	-118.054
-162.183	142.653	-151.943	142.354	-169.314	78.5743	-178.222	-113.074
150.324	128.93	151.569	144.218	177.455	159.746	174.608	-158.063
				158.358	-66.3033	-177.076	-95.6005
				-139.865	144.43	-164.392	147.772
				173.096	172.882	-171.422	172.321
				176.712	121.521	169.316	174.748
				170.965	76.5868	-169.611	125.187
				-167.036	153.67	-175.709	162.672
				-167.953	-167.589	173.943	-137.075

## Sheet: Fig 3D
Ipsilateral Flexor Burst
	Amplitude Change		Burst duration change		Inter-Burst interval change
	En1-GFP	En1-Arch	En1-GFP	En1-Arch	En1-GFP	En1-Arch
	-0.779455	18.1552	0.974267	7.3531	-10.3256	10.6623
	0.725869	-3.04135	-10.2938	43.3448	-7.21092	0.127514
	-8.44024	-0.80938	-2.77395	60.8122	-10.1243	34.726
	-3.78283	86.4988	1.70287	62.8966	-7.48714	19.2222
	-4.84561	-8.09539	-5.24227	48.0238	-1.5581	16.2101
		69.3036		36.935		32.1204
		101.756		48.858		107.052
		6.5314		34.0422		9.47065
		49.3369		34.2853		-5.86251
		20.2542		41.0871		-22.8748
		-5.03632		22.72		20.4874
		25.5465		42.0157		21.3375
Ipsilateral Extensor Burst
	Amplitude Change		Burst duration change		Inter-Burst interval change
	En1-GFP	En1-Arch	En1-GFP	En1-Arch	En1-GFP	En1-Arch
	22.7695	81.7836	-15.7575	-6.37299	3.49931	52.1181
	19.3092	77.9491	-5.05349	18.8093	-9.94588	19.0446
	-15.4823	91.242	-7.53285	13.6777	-10.7761	74.117
	8.83491	60.4457	-0.568985	18.6669	0.147751	75.1764
	1.56116	71.9924	-3.95226	33.9945	-6.37209	35.4798
		99.1342		29.2159		33.1421
		64.7365		71.8742		69.2058
		63.2802		-19.6281		83.4537
		22.691		28.4096		3.82531
		98.5763		7.91438		-8.14482
		21.161		17.5229		33.1256
		60.235		21.5065		49.1213

## Sheet: Fig 3E
En1-Arch Duty cycle
	Control L2r	Control L5r	Light L2r	Light L5r
	0.45783	0.622921	0.440074	0.514404
	0.415404	0.563877	0.461107	0.618902
	0.479416	0.558629	0.511575	0.448784
	0.432189	0.681101	0.510187	0.603858
	0.474576	0.462929	0.527659	0.450945
	0.410935	0.61151	0.422369	0.605209
	0.458324	0.554016	0.370943	0.540546
	0.446927	0.611031	0.503104	0.420746
	0.445433	0.669102	0.52336	0.71955
	0.343201	0.546736	0.492544	0.591627
	0.415755	0.563455	0.420274	0.524155
	0.399015	0.559214	0.428479	0.517172

## Sheet: Fig 3F
	amplitude (mV)		Membrane potential (mV)		Number spikes per cycle
	Control	light	Control	light	control	light
	3.76571	4.39119	-59.959	-58.7215	0.854396	0.99513
	4.393	5.91411	-57.3506	-54.1373	0	0.25
	7.09015	14.0681	-48.1749	-47.7182	3.36869	10.9133
	4.99761	7.37595	-53.2132	-55.2873	0	0.429167
	7.46005	9.45156	-43.6768	-41.7076	17.675	18.4798
	8.7478	9.1439	-55.3012	-51.2161	2.90476	11.5714
	2.09338	2.03989	-60.3986	-62.4689	0.047619	0
