# Supplementary material for: V1 interneurons regulate the pattern and frequency of locomotor-like activity in the neonatal mouse spinal cord
Source: PLoS Biol. 2019 Sep 12;17(9):e3000447. doi: 10.1371/journal.pbio.3000447 (PMC6759197; doi:10.1371/journal.pbio.3000447)
Supplement: S3 Data — (XLSX) [file pbio.3000447.s009.xlsx]

## Sheet: Fig 4
	Frequency (Hz)		Amplitude (mV)		Burst Duration (s)		Inter-Burst interval (s)
	Control	light	control	light	control	light	control	light
	0.705234	0.542455	2.57312	6.28887	0.575824	0.487638	0.512894	0.555754
	0.836643	0.74081	6.13035	7.97131	0.461287	0.467236	0.579531	0.677715
	0.74012	0.740879	2.80479	4.18609	0.302517	0.320539	0.527901	0.568478
	0.872171	0.840337	4.98209	4.57379	0.463105	0.558391	0.652721	0.585257
	1.03854	0.713981	5.24254	5.64563	0.419237	0.615208	0.418926	0.767735
